# Supplementary material
Source: PubMed Central journal article supplement (PMC5361225)
Supplement: NIHMS830328-supplement-supp_data1_2__supp_fig1.pdf [file NIHMS830328-supplement-supp_data1_2__supp_fig1.pdf]

## **Supplementary Data 1**

### **RNAi sequences**

All RNAi plasmids were sequence verified using M13F(-21) primer: 5'-TGT AAA ACG ACG GCC AGT-3'

#### ***sfa-1* RNAi clone (Y116A8C.32)**

TAGGGCGATTGGGTACCGGGCCCCCCTCGAGGTCGACGGTATCGATAAGCTTGATTTGGAACA  
GTTGAGACATGAGAAAATTCAGCTTTATTGAAGATTAATCCGAATTTCAAACCGCCCGCTGAC  
TATCGGTATATATATAGGAAAATTTGAATTTTTCCGGCAAAAATGCGAGTTTTTGGTGAAAAAT  
CACAGATTTTCAGAGTTTTTCGGCTGAAAATTTGACCTTTTTTCGCTGCAAATGTGTGATTCGGCT  
GAAAATTCATTTTCAGCAATATTTAGCTTGAAACTACCGATTTTTTTGTTGAAAATCATTTAA  
AATTTCCGGATTTTCCGTTAAAAGTTGGAATTCCTCAAATTTTTGCCTTTTGAATTTCCGGCTA  
AAATTTGACCGAAAACACTAGAATTTTAAGCTGAAAACCTGGATAAATTCAGAAAATTTGAACAA  
TTGAGGTTTTATGGGATTTTTACGGATTTTTGACAAAAAAACGGTAGTTTTCAAGCTGAAAAT  
TGCTGTGAATAAAATTTTTTAAAATCTGAAACTCCAAAAATCTGTGATTTTTCCACAAAAACTCGC  
ATTTTTGCCTAAGAAATTCAAATTTTAAGCGTAAATTATAATTTTTGCAATAAAATATCTAAAA  
TTTCAATTTTTTTTCAGTGCTCCAAACATCCGTCTACACGACAAAGTCTGGATTTCCCAGGAACA  
ATTTCCCTGATCTCAATTTGTGCGCCTACTCATTTGGTCCACGTGAAAATACGCTGAAAAGCTTG  
GAAGCTGAAACTGGAGCCAAGATATTATCAGAGGAAAAGGATCTATAAAAGAGGGAAAATTGA  
CGAATCGACTCGGACCGATGCCCTGGNGAAAATGAGCCATTACATGCATATGTAAGTGGAACTGA  
TATGAATGTTATCAAAAAGCATGTGAGAANATTAACAAGTGATTGCTGAAGCCACTGCTCTG  
CCGGANACATGAGCTCAGGAAGCTGCAACTGANANACTCGCACTGTTGAATGGAACCTTCCGAC  
CGGANGATTTNGCAA

#### ***repo-1* RNAi clone (F11A10.2)**

TAGGGCGATTGGGTACCGGGCCCCCCTCGAGGTCGACGGTATCGATAAGCTTGATTTGGACGA  
TGTGGAACAAAGACACGAAGCAATTCCTTCTTACAAGTCGCATTCAAATTTGGAACGACTCGATGA  
TCAGCCGTAATGATACTCTATGTTTTTATCTTTTTGATTTCAAATTCAAAACAATTTTTT  
CGTGTTTTTTCGATGATCTAACAATAAATTAATTTTCTTTTTTTTTAATGATGATATTTTATTTAA  
ATCAAGTATAGGTTGACTGATCCGTCTACAATGTCTATTTCAATTAATAATTTATAGTTTTTCATAGT  
TTAAAAAATCAGTTTCAGATGGCGAAGAAGGTTGTCAAAGAAAAGCTGAAGCAGTGTCCGCTG  
ACGCAGAAGCCGTTGCAGAAGCTCCGAAGAAAATCAAGAAGCAGAAACCAAGTCTTCCAGTCTC  
TGAACCTGATAATATCAGGCTGGTGGATTATCAAGTCTCTTCGGAAAGTCGTCAGAAGGAGCA  
GCAGTACAAGAGGAAGTTGTGAAGGGAGATAAAGTAACTGAAAAACCTAAAAGAAGAAAGTATG  
ATCCAAAAAAGGCTGAAGAAGAGAAGGCAGCTGATGCTGCTGCTGCTGCTGAAGAAGTTGCA  
CCTGAAACAGAAGGAGAAGAGAAAAAAGATGAAAATAAGGAAGGAAAGCGAGACAGAACGAAGC  
AAAGAGAGAATAGAACTCTTCAAAGTCAAATGCACGTGCTTCAGCTGCTGAAAATGCTCTGAC  
TGTTTTTTGTTGGAAATATGCCATTGACAATGAACGAGAAATCAGTCCGTGCAATTTTTCTCCGAC  
TTTGGAACTATTTTCTCTGTCCGTATGAGAAATCTGCTTCTGCGAATGAGAAATTGACGAAA  
CGAGTCACTCATTTGACAGGAAAATTTGAATGACAAACAGAGTTCTCTCACGTTCTATGTGAAAT  
TCGGAGCAGAAGAATCAGTGGAGAAAGCTCTGAAGTACNANGGAACCAAGCTGGACGATCATGN  
GATTCGTGNNGACAAAGTTGGA

#### ***hrp-2* RNAi clone (F58D5.1)**

TAGGGCGATTGGGTACCGGGCCCCCCTCGAGGTCGACGGTATCGATAAGCTTGATATCACAAG  
TTTGTACAAAAAAGCAGGCTTGAGTGAGGAAATCAAACAGGAAGTAAAGGAGGAGGCTCCAGAA  
ACAACGACTGAAGCCAAGACCGAAGAGGCTGCTCCTGTGCGAGAAGTAGTTGCAGAAGTTGTTA

CCAACGGAGATAAGCCGGCTGAAAATGGAAAGCGCCCGGGAGACGGACGAGGGGGACCAGCATC  
GAAACGAGACAACGGAAAGCCTGATTTCTCGGCTGACGTCAACATGAGCACTTTCTACCCAGCT  
TTCTTGTACAAAGTGGTGATATCAGATCTGCCGGTCTCCCTATAGTGAGTCGTATTAATTTTCGA  
TAAGCCAGTTGCTTCTCGCTCACTGACTCGCTGCGCTCGGTCGTTTCGGCTGCGGCGAGCGGT  
ATCAGCTCACTCAAAGGCGGTAATACGGTTATCCACAGAATCAGGGGATAACGCAGGAAAGAAC  
ATGTGAGCAAAGGCCAGCAAAGGCCAGGAACCGTAAAAAGGCCGCGTTGCTGGCGTTTTTCC  
ATAGGCTCCGCCCCCTGACGAGCATCACAAAATCGACGCTCAAGTCAGAGGTGGCGAAACCC  
GACAGGACTATAAAGATAACCAGGCGTTTCCCCCTGGAAGCTCCCTCGTGCGCTCTCCTGTTCCG  
ACCCTGCCGCTTACCGGATACCTGTCCGCTTTCTCCCTTCGGGAAGCGTGGCGCTTTCTCATA  
GCTCACGCTGTANGTATCTCAGTTCGGTGTANGTCGTTTCGCTCCAAGCTGGGCTGTGTGCACGA  
ACCCCCGTTTCAGCCGACCGCTGCGCCTTATCCGGTAACTATCGTCTTGAGTCCAACCCGGTA  
AGACACGACTTATCGCCACTGGCAGCAGCCACTGGNAACAGGATTAGCAGAGCGAGGTATGTAG  
GNGNNGCTACAGANTTCTTGAAGTGGTGGCCTAACTACGGCTACACTANANANAGTATTTGGNA  
TCTGCNCTNNGCTGAAGCNAGTTACCT

*raga-1* RNAi clone (T24F1.1)

AGGGCGATTGGGTACCGGGCCCCCCTCGAGGTCGACGGTATCGATAAGCTTGATATCACAAGT  
TTGTACAAAAAAGCAGGCTTGTCTTCAAACGAAAAGTTCTTCTGATGGGCAAAGTGGATCCG  
GCAGGACTTCGATGCGTTCGATCATATTTGCCAACTACATCGCCAGGGATTGTTTCGCGTCTCGG  
GCCAACAAATCGAAGTTGAGCATGCTCATGTCAAGTTCCCTCGGAAACATGGTTCTTCACTTGTGG  
GATTGTGGTGGTCAGGAATCATTCATGGAGAACTTCTCGTCTCGCAAAGGATCAGATCTTCA  
AGAATGTTCAAGTGCTCATATACGTATTCGACGTGGAAAGCCGAGAGTTCGAGAAAGATCTCAG  
ATATTACCAGTCTTGTCTCGAAGCTCTTCTCCAAAATTCACCGAATGCTCAAGTCTTCTGTCTC  
ATTCACAAAATGGATCTGATCGAGGAGGACAAACGTGAAGAGACGTTCAAACGTCGTGAAGCAG  
ATGTACTGCGATACAGTGAACCTTGCAGCGACTCCACTTCAGAATGAACGGACGAACGCTGTTTG  
TCAATGCTTCAAGAGCAGTATTTGGGATGAGACACTCTACAAAGCGTGGTCCGCGATAGTCTAT  
CATCTGGTGCCAAACGTCGGAACCATGGAGGACAAGCTGAAGAAGTTCGGAGCTATTTTGGATG  
CCGATGAAGTTATTCTATTCGAGAGAGCGACGTTCTGTTATTGCGCATGCTGTTCTCCGAGA  
GCATNANNNTCCACATCGATTTCGAGAANGTTTCAAACATCATAAAGCAATTCAAGCTTTCATGC  
ACAAAATGGGGTCCAAGTTGGATTTCGATTCAAGTCCGAAACAGTCAGTCTCCTCGCATTCATCG  
ACTCGTTCACCCAGAACAATTATGTTATGATCGTGATACCCGACGGNACGCATCGGCTCCNNGA  
TCANNTGAACGTNANACGCGAGNNGNTCGAGNGATCGANACGAAAGCTACCAGCTTCTGNACA  
AGNNGNANNTCAGATCTG

*hrpf-1* RNAi clone (W02D3.11)

GGGCGANTTGGGTACCGGGCCCCCCTCGAGGTCGACGGTATCGATAAGCTTGATATCACAAGT  
TTGTACAAAAAAGCAGGCTTGCCTTCTCGAGATTCTAGAGCATTGAGTGATCCATACGCCGCA  
GAATCAAGATATTCGGAGTATGGCTATGAATCGCGGGAACCATATTGGCGTGGTGGTTCTGGAG  
GGCTCCATCTATTGGAGGAGGTGTTGGAGGAGGCGGAGCACCCTTGCTCCAACCTGGACGGGA  
TCCTTATTCGGTAGGAGAATCTTGGGCTAATGGAGCAGGAGGGCCAGGTGGGCCACCACCGGTT  
TCTTCTGATAGAGATCGGTACGGAAGTGGTGGATATGCAAGTGAGCCGTATGCACAAAGAGAAG  
CTGGAGGAGCTATGCGCCGATCAGAATACGGTCTGCTCCTGATGATCGTTATTCAAAGCCAGAACC  
ATATGGATATTCTAGAGACCGTACTATGGAGCCCCTCAAATCAGCATTTTGTGCTCCGAATG  
CGTGGAGTACCATTCCGTGCCAGCGAGGCAGATGTCTATGATTTCTTCCATCCAATTCGACCGA  
ATCAAGTAGAATTGCTCCGTGATCACCATTCCAACGGCCAAGTGGCGATGCTCGTGTCATATT  
CTACAATCGGAAAGATTATGATGATGCACTCATGAAAGATAAACAATATATGGGAGAACGTTAC  
ATTGAGATGATTCCGGACAATGGAAGATATTACCAGCTTTCTTGTACAAAGTGGTGATATCAG  
ATCTGCCGGTCTCCCTATAGTGAGTCGTATTAATTTTCGATAAGCCAGGTTGCTTCCCTCGCTCAC

TGACTCGCTGCGCTCGGTCGTTGCGCTGCGGCGAGCGGTATCAGCTCACTCAAAGGCGGTAATA  
CGGTTATCCACAGAATCNGGGGATNACGCNNANNAACATGTGAGCAAAAANNACGCAAAAAGGCCA  
GGAACCGTAAAAAGGCCGCGTTGCTGGCGTTTTCCATNNCNCGCCCCCCNGACGANCATCACN  
AAANTCGACGCTCAA

*snr-1* RNAi clone (Y116A8C.42)

ATAGGGCGATTGGGTACCGGGCCCCCCTCGAGGTCGACGGTATCGATAAGCTTGATATCACAA  
GTTTGTACAAAAAGCAGGCTTGACTTCAGTTGGTGTCCCAATCAAGATTCTTCATGAGGCCGA  
AGGTCACATGGTCACGCTCGAAACCGTTACAGGCGAAGTTTACCGAGGAAAACCTTCTGAAGCC  
GAAGACAACATGAACTGTCAGCTGGCTGAAACCGTTGTGACTTTCGCGACGGAAGAAGTCATC  
AATTGGACAACGTTTTTCATTCGCGGAAACAAGATCCGATTCATGATTCTGCCGGATATGCTCAA  
AAACGCGCCAATGTTCAAAAATATCGGAAGAGCCAGAAAGGAGCCATTGGAATGGGTTTGGGA  
GGTCTCGATCAGCGTGGAAAGAGGACGTGGAACCGCTTTCGCTCGACCAATGGGCCGTGGAGGAC  
CACGTGGAATGTCTCGCCCGGGAGGAGCTCCAACGTTCCGTGGATAACCCAGCTTCTTGTACAA  
AGTGGTGATATCAGATCTGCCGGTCTCCCTATAGTGAGTCGTATTAATTTTCGATAAGCCAGGTT  
GCTTCCTCGCTCACTGACTCGCTGCGCTCGGTGTTTCGCTGCGGCGAGCGGTATCAGCTCACT  
CAAAGGCGGTAATACGGTTATCCACAGAATCAGGGGATAACGCAGGAAAGAACATGTGAGCAAA  
AGGCCAGCAAAAGGCCAGGAACCGTAAAAAGGCCGCGTTGCTGGCGTTTTTCCATAGGCTCCGC  
CCCCCTGACGAGCATCACAAAATCGACGCTCAAGTCAGANGTGGCGAAACCCGACAGGACTAT  
AAAGATAACAGGCGTTTTCCCCCTGGAAGCTCCCTCGTGCGCTCTCCTGTTCCGACCCCTGCCGCT  
TACCGGATACCTGTCCGCCTTCTCCCTTCGGGAAGCGTGGCGCTTCTCATAGCTCACGCTGT  
NNNATCTCAGTTCGGTGTAGGTCGTTTCGCTCCNAGCTGGGCTGTGTGCACGAACCCCCGTTCA  
GCCCCGACCGCTGCGCCTNATCCGGTAACTATCGTCTTGAGTCCNACCCGGTAAGACACGACTTA  
TNNCCACTGG

*snr-2* RNAi clone (W08E3.1)

AGGGCGATTGGGTACCGGGCCCCCCTCGAGGTCGACGGTATCGATAAGCTTGATTTTTTCAAAC  
GGTCTTTGTGACTTTTAGAAGTTGTTTTGCAGAAATATTCGTTTGTTCATCTCTTGTATCATC  
AGAACTCTTTAATTTCTTTTCATTTTGAAAGAGTAAACTTCAATATTCATTATTTCCAGGTCCTA  
GACAAAAAATCACAAACCAACGCCTCAAGATGGTAAGTTTTTCTACAGTTCTCATGGAGATAAAT  
ACAAAATATTTTTCTTTTTTCAGACTATCTCCAAGAATAATAAGATGATGGCTCATCTCAACTACAG  
GATGAAGATCATCCTTCAGGACGGTAGAACCTTCATCGGATTTTTTCAAGGCTTTCGACAAGCAT  
ATGAACATTTTTACTCGCAGAGTGCAGGAAACACAGACAAATCAAGCCAAAGGCCGGAAGAAGG  
TATTGTTTTCTGTTTCTGCAGCGTTGATTGAAGACAAAACCATTTTTATTTTCAGACCGATGGA  
GAAGAAAAGCGAATTCTCGGCCCTGTAAGTGGTCCGCGGAGAACATATCGTCTCGATGACCGTCG  
ACGGACCACCACCAAGAGATGACGATTCAGTGAGACTCGCCAAGGCCGAGGAGCTGGAGGTGT  
CGGACAAGCCAAGCCAGGAGGCCGTGGAATGCCAGCTATGCCAGGAATGCCGGGAATGCCACCA  
GGCGGAGCACCAGGAGGCCCTCTTGGAGCCATGCGCGGACACGGAGGACCAGGAATGGCAGCCA  
TGCAGCCAGGATATGGCGGCCACCAGGANGACGTCCATTCTAAAATTTTGTATCCAAATCCG  
CATGTTTTCTATCATTTTTCCCAAATCAGATCTGCCGGTCTCCCTATAGTGAGTCGTATTAATTT  
CGATAAGCCAGGTTGCTTCTCGCTCACTGACTCGCTGCGCTCGGTGCTTCGGCTGCGGCGAGC  
GGTATCAGCTCACTCAAAGGCGGTAATA

*uaf-2* RNAi clone (Y116A8C.35)

TAGGGCGATTGGGTACCGGGCCCCCCTCGAGGTCGACGGTATCGATAAGCTTGATTATGAAAT  
TGCAGAAATCCTCCTTTTCGAGCAGGTTGTAACCTTCGTGTTGACGGCATCTAGACTCGCGGAAGTC  
GGTGACAGGGCACAACCTGCGTAGATTGGTTGTCCGTTGAACTGAAAGCGAAAAATATTTTA

AAAATCGATAATTTTACAGAAAATTTTCATAATTTTGCATTTAGCATAAAAAATTTCCAGCTAA  
ATTAGCAAAAATGATACGGGCTAGCTCGCCAAAGTGCTCAGATGGCCCCTGTGCCAGGTATATC  
TCCATTTCAATGCCCTTCCGATGGGCAAAGTACAGTGGCACGTTCTCTTACAGCACTTGAGCT  
CAGCTTGAGCCCTATCAACACAGCAGCTTACGCTTACGCACCATCGATTATTCAAATCATTCTT  
TGCTTTCTCGGCGTCTCTTCTTCATAAATTTGACGTATACGTTTCCGACCATGTGTTCTCCG  
ATATTCTCACAAACGTTGATCTCCTCCACTTCTCCATATTTTCGCTCCATCTCCACAAAACCT  
CCTCGTAGAAATCGTCAAAATAGCGCTGTTCTGATCATTCGGCTTGCCGACTTTATCGAAAGC  
ATCCGCTGACGGACATCCACTACCGGATTGTGGTAGAAGTTTTGAGCACAACCTGTTGGCGAG  
AATGTCGGTGTATGATGGGCTCTGGAGCATTTGTCTCCGTGGCGGCAGGCTCCTGTCTGCAAAA  
ATTATTTAATTATTGAATTTTTTTCACAGAAATCCACAACAAACCTTGAAGAAAATGAGCAATT  
GACTTTATCCTTCTCAGTACCATAGATTGAGGCCAGGTA CTGGCTCCGGAGAGCCCGTCACCA  
TACGACATTGGGATTCACTAAAAAAATGATTTTTGACGAAAAATTCAATTTAGCGGGAAACC  
CTGAGAATTACGATTTTTTAAACACAAATCTGACGGANTACTTCAGAATACAACGTAAAACCTCA  
AAATATCANAATTCATGCAAAAAACAACTGCGAACCTGAAACNNATAGAAAATGG

rsp-2 RNAi clone (W02B12.2)

GGCGATTGGGTACCGGGCCCCCTCGAGGTGACGGTATCGATAAGCTTGATTTTATAACTCT  
GTGGCATCGTCTGTGCTCCCATTTTATTGATTATCGACTTAATTTTCCAGCGCGTCCGCTGCATG  
TGCATGTACATATTGCCCTCTATTTAATGTGCAATGCCAAATCTCTTCTCTCTGGCCACAA  
TAATTTTTATTTCTCCAGACTTTTCTTATTTCTTCTCTTTTTGAATTGACTTTTCTCATTCTT  
CACTTATTTAGACCTCTAAACATGGTTCGTGTCTACATCGGTCGTTTGCCAAATAGAGCATCT  
GATCGTGATGTCGAGCACTTCTTCCGCGGATATGGAAAGCTGTCTGATGTCATAATGAAGAAGC  
GATTCGGTTTCGTGGTAAGAGATAACATATTTTCGTCAGAATATCTTGAATATGTCATAATTT  
AGGATTTTCAAGACCAGCGCGATGCCGATGACGCTGTCCACGATTTGAATGGGAAAGAGCTTTG  
TGGAGAGAGAGTCATTCTTGAGTTTCCACGGCGTAAAGTTGGGTACAACGAGGAAAGAAGTGGG  
AGTGGTTTCAGAGGACGTGAGCCAACGTTTCAGAAAAGGCGGCGAGCGCCAGTTTTTCCAACCGAT  
ACAGTCGTCCGTGCTCGACTAGATTCCGTTTGGTGATCGATAATTTGTCTACTCGTTACAGTTG  
GCAGGTAAGATACATGACTGCGAGCCATAGCGATTACAAGTTGCGTGTGTTGAGTGTGATTGAA  
CAACTAACGAAATACTACCCCGTTCCAAATTTTACTGAAAACGTCACTCATTTTTTTCAAAC  
GAACATTTTGAATGCTACAGCAGCAACTCAGTGGGTGTGCCATTTGCCAATACAATTTGCAATT  
CAATTGCTCTCAATCAATTTCTCAGTCAATGGNATTTCTTCTTCTCCTATCAATCTGGCCCTA  
CTTCACAAACAATCAATACCCTGNACCTGAATTTTNNNCATCAAGGACCACATCCGCAAGCTGG

rsp-3 RNAi clone (Y111B2A.18)

AGGGCGATTGGGTACCGGGCCCCCTCGAGGTGACGGTATCGATAAGCTTGATATCACAAGT  
TTGTACAAAAAAGCAGGCTTGCCACGCGGCGGCTCAGAGGACCAAAAAGTCTACGTTGGCAACC  
TGCCAGGAGACGTCCGAGAGAAGGAAGTCGAGGACATTTTCCACAAGTATGGCCGCATCAAGTA  
CGTCGATATCAAGTCAGGACGTGGACCGGCGTTCGCTTTCGTCGAGTTCGAAGATCACAGAGAT  
GCCGAGGATGCGGTTCTGTGCTCGCGATGGCTACGAATTCGATGGCCGTCGCATTCGCGTTCGAGT  
TCACTCGTGGAGTCGGACCACGTGGCCAGGCGGTCGCCACTCCAAGACGGAGGTGATCACCG  
CGGTGGAGACTTCCGAGGAGGACGTGGTGGTGGTTCGTGGAGGTGGACCTCAGAGAAGAACCGGA  
TACCGAGTGATCGTTGAAGGTCTTCCACCAACCGGGTCGTGGCAGGATCTTAAGGATCATATGC  
GTGATGCTGGAGACGTCTGCTATGCGGATGTGGCTCGAGATGGAACCTGGAGTCGTTCGAGTTTAC  
TCGTTACGAGGATGTCAAGTACGCTGTTTCGCAAGCTTGATGACACCAAGTTTCAGATCACATGAG  
GGTGAAACTGCCTACATTCGCGTTCGTGAGGACAACCTTTCTGGAGGCGGAAGCGGTGGTGGTG  
GCCGTGATCGTAGCCGTTCCGCGCTCTCCAAGAGCCGAACGTCGTGCTTCGCCAAAGTACTCACC  
TCGTCGTTCTCGTTCCCGCTCTCGCAGCCGTTCCCGCTCTCGTTCTCGCTCGGCCAGTCGCAGT  
CCATCTCGCTCACCATCTCCACAATACCAGCTTTCTTGTACAAAGTGGTGATATCAGATCTGC

CGGTCTCCCTATAGTGAGTCGTATTAATTTTCGATAAGCCAGGTTGCTTCCTCGCTCACTGACTC  
GCTGCGCTCGGTCGTTTCGGCTGCGGCGAGCGGTATCAGCTCACTCANNGCGGTANTANGGTTAT  
CCACAGAATCAGGGATAACGCAGGAAA

uaf-1 RNAi clone (Y92C3B.2)

TAGGGCGATTGGGTACCGGGCCCCCCTCGAGGTCGACGGTATCGATAAGCTTGATATCACAAG  
TTTGTACAAAAAAGCAGGCTTGCAACTCGGCGACAAGCAGCTCGTCGTTCAACTTGCCGTGTGCT  
AATCAACAACGTCATAACACAAATCTGCCGAACCTCGCGTCAGCAATTGCCGGAATTGATCTCT  
CCCAAGGAGCCGGCCGAGCCACTGAGATCCTTTGTCTCATGAATATGGTGAAGTGAAGGATGAGCT  
GAAAGCTGATGATGAGTACGAAGAGATTCTGGAGGATGTACGCGATGAATGCTCAAAAATATGGA  
ATTGTTTCGCTCGTTGGAAATTCCAAGACCGTATGAGGATCATCCGGTTCAGGTGTTGGGAAGG  
TTTTTCGTCGAATTCGCCTCCACATCCGACTGTCAACGTGCTCAGGCTGCTCTGACCGGACGAAA  
ATTTCGCGAATCGCACCGTCGTCACCTCCTACTATGACGTCGACAAGTACCACAATCGTCAATTC  
TACCCAGCTTTCTTGTACAAAAGTGGTGATATCAGATCTGCCGGTCTCCCTATAGTGAGTCGTAT  
TAATTTTCGATAAGCCAGGTTGCTTCCTCGCTCACTGACTCGCTGCGCTCGGTCGTTTCGGCTGCG  
GCGAGCGGTATCAGCTCACTCAAAGGCGGTAATACGGTTATCCACAGAATCAGGGGATAACGCA  
GGAAAGAACATGTGAGCAAAAAGGCCAGCAAAAAGGCCAGGAACCGTAAAAAGGCCGCGTTGCTGG  
CGTTTTTCCATAGGCTCCGCCCCCTGACGAGCATCACAAAAATCGACGCTCAAGTCAGAGGTG  
GCGAAACCCGACAGGACTATAAAGATACCAGGCGTTTTCCCCCTGGAAGCTCCCTCGTGCGCTCT  
CCTGTTCCGACCCCTGCCGTTACCGGATACCTGTCCGCCTTTCTCCCTTCGGGAAGCGTGGCGC  
TTTCTCATAGCTCACGCTGTNNTATCTCAGTTCGGTGTNNTCGTTTCGCTCCAAGCTGGGCTGTG  
TGCACGANCCCCGTTCANCCCGACNNTGCGNCNNATCCGGTANTATCGTCTTGAGTCCA

sym-2 RNAi clone (ZK1067.6)

TAGGGCGATTGGGTACCGGGCCCCCCTCGAGGTCGACGGTATCGATAAGCTTGATTCTCGATC  
TATTCCATCAAAATCGGTTGAAGTGGGAAGTTTTGTGGATGGTGAGAATAAGCAGCGAAGTTCG  
GAGCAGATAACTGAGAAATTTGTGATAATGGGCTCGTTTTGAGGCGGTGGAGCACCACGATTGCG  
GAGCGTCAAAATGGCTTCTCCCGACACAAATGAGTTGGCCAACGTGTGAATAGGACCTGGAAT  
TGGTTTTTGTTTTAGCTTTATAAGAACTTATGAGTAACTTACATTATCAACAGTATGTTCCGG  
TGTTGTGAAATTAGCCACCAGCTCAGGAACCTCCGATGCTCATATGGATACCATAGATAATCAAT  
TGGGTAACCTGCCCTGGCACAATTTGGTGAATTTGGTGGAGATGGGTAACCTGACCAGAACTGTT  
GTGGTTGTGGTGCCTGTGGTGGCAGCTGCCCATGAAACCCAATGGAGCCGGTGGTGGAACTG  
ATGTTGTTGACCAACCAGATGATGAAGTTAAGCTCCTCAGCAGATGCTTGGAAACTTTCGATG  
TATCTCTTCTTTTTGCCAACAGACATAAAGTTATTGTGAACTCCAGCAGCGCAGGCAGAAGCCG  
CTTGCTCATTGATCATTGAATGAATGCTTCACCTGATGGATGACCTTGATTGTTGTATACCAT  
ATGAACACCTTGGAACTTTACCATTGTGCAAAGTCACCAAGGAATGTGACGATATGTTGCACC  
TGGAAGAGCATTAACCTTGTGTACTAGAAAATAAGTTTTATAAAAATTTCTCTGAACATATGTTT  
ATTTAAAACCTGTCAGGTAGGTTTTTTTCAGCGCAGAAAACAAAAAAGTTTGGAAAGAAAGAGTT  
GTCGCTGATCCCTGCCTACAATATGACTTCGCGCCTTCTGCCAAGTTACTATGAATGATACACT  
TAGAAATGCGAAAGTCTATACTATTGAGCANCAACGTTTAAACTTAAAATGCANAAAACAGG

smu-1 RNAi clone (CC4.3)

GGGTACCGGGCCCCCCTCGAGGTCGACGGTATCGATAAGCTTGATTTCCGAGGATATTCGAAT  
TTTACACGTCATTTTCAGCCGTTTTTTCACCGAATTTTCGCTGAAAATGTCATCGATTGAGATCG  
AATCTTCAGAGTAAGTTTATCTAAAAAGTTTTTCATTCAAAATGTGTAAAAATTCATTTAAAAT  
AACCCAAAAATCATTAATCCTCGATATTTTCAGTGTAATCCGTCTCATCGAACAAATTCCTCAAA  
GAATCGAATTTGCACCGAACTCTGGCGATTTTTCAGGATTTTTCCTGCATTTTCAACTGGGAA

AATGAAAGAAAATCGATAATTTTCAGGAAGAAACCAACGTTTCGCTCAATACAGTCGACTCAATT  
GATGGATTTTGTAAATGAAATTACGTCTGGAAATTTGGGATAACGTGTTGAAAACCGTTCAATCGT  
TGAAATTACCCGCCAAGAACTTATCGATCTGTATGAACATGTAAGATATGGGAAAGAAGGAAA  
AAACCGAGATTTTACTTGAAAAATTGAATTCCTTCGCGGGATTTTCACCAAAAATTGTTGAATAT  
TCATTATTTACGCTGTAAAACAAAAAATAAATCAAAAACACTACGTTGAAATCGCGTTTTTA  
AGCGAATTTTCTTCAGAATTGCCAGATTTTAACCCCAAATTTTGCAGTTTTTAATAAAAATTTT  
ACCTTTTCGGCTCAAATGTTAGATTTTCTGAAAATTTAGTACAAAAACAATTTCTTCGTAAA  
TTTTTCAAATTTTCAGGTAATAATCGAGCTTGTGGAGCTCCGTGAGCTGGCGACCGCCCGTCTC  
GTCGCCCCGTCAGACTGATCCAATGATTTTGCTAAACAAATTGATCCGGATCGATTCNCCC GCCN  
GGAATCTCTTATCAACCGCCCGTATTTTCGATGGACNANANGNTTTA

*hrp-1* RNAi clone (F42A6.7)

GGCGATTGGGTACCGGGCCCCCTCGAGGTCGACGGTATCGATAAGCTTGATTTGTTTTTCGCG  
TAATTCCTTCATTTAATTCAGATAATCTAATTGTTGTGTAGTTTTAGCTCGAATTTATCCGTAA  
TCTTTGATTAAATACGAATAAACTCGCTAAAATAGTCTTATTTCTCAGATATTTATCGATTTG  
TTATTTTCCACGAATAGTCTACTCGTGCATGGCGTCTATATTTAACTTAATAATCTATTTTTAG  
ATTTATCTTTACTCTAACTTGTACCTATTTTCAGTGATCAACACCTCTGTCACTCTTTGTGAGTA  
ATAGCGTTCGATAGGTAGTTACACCGTGAACACTAGCCTGTCTATTTCTACTTCATAAGCTAAG  
AACTACTTGTAGCACAATCCGATCGACTACTAAGAACTAGATCATGACGGACGTGGAAATCAA  
GGCTGAGGTTACGTTTTGTTCACTTGTCTTTTAGGGTGTAGGCCACCTGATTTGGGTCCCGATCAT  
TTAATTATCGATTTTATTTTCAGAATGGAAGCGGAGATGCCTCGCTCGAGCCAGAGAACCTTCG  
AAAGATTTTCGTTGGAGGACTCACGTCAAACACCTCCGATGACCTGATGCGAGAGTTCTACTCA  
CAATTCGGAGAAATCACTGATATCATCGTCATGAGAGATCCAACCTACCAAGAGATCCCGCGGAT  
TCGGATTTGTACCTTCTCTGGCAAACTGAAGTCGATGCTGCCATGAAACAACGCCCGCACAT  
CATCGACGGAAAGACCGTGGACCCGAAGCGTGCCGTGCCACGTGATGATAAGAACCGCTCCGAG  
TCGAATGTCTCCACCAAACGCCTGTACGTACGCGGAGTTCGTGAGGATCACACCGAGGACATGC  
TCACCGAGTATTTACAAAGTATGGAACCGTCACCAAATCCGAGATTATTTCTCGACAAAGCCAC  
CCAAAAGCCANAGGCTTCGNATTCGTCTCNCNTCGATGATCATGACTCTGTGNTCANGCGTTTTCA  
AAATCCCATATGGNCACGGANNCAGATGTGACGTGCGCAAGNANNNNNTCCNNNNCGANATGAN  
AAG

*phi-9* RNAi clone (M28.5)

TAGGGCGATTGGGTACCGGGCCCCCTCGAGGTCGACGGTATCGATAAGCTTGATTCTCTTTT  
CTTTTGTCTCTCCCGTTGCCGTTGTATTTTTCTTCGGAAATTAATAAGTTGGTACAATAAAT  
TAAAATAAATGGAATTTTGATTATCTATTACTTTTCAGATATGTTACTAGTGCAAATCATCGTA  
AAAATTTGAATTTACAGCTTTGAAATCGTTTTTATTATTTTTTCTCTTGAATCGATAAATAATT  
CTTTTCGATTGTAGCAATTTTCAACCATCTTTATTTTCAGAAAAGAAGAAAAATGGCCGATGATG  
GAGTCAATCCGAAGGCCCTTCCCCTGGCCGATACCAACTTGTCTCAAAGCTCATGGATCTCGT  
CCAGCAAGCGATGAACTACAAACAGCTCAAGAAGGGAGCCAACGAGGCCACCAAGACTCTCAAC  
AGAGGAATCTCTGAGGTAAGTGTATCGTAACCATGTTGAATTGCATTCCATTTTCAAATCAA  
TTTTCGAACCAAATTAATTGAATTGTTTCAGATCATCGTCATGGCCGCCGATGCCGAGCCACTG  
GAGATTTCTCTCCATCTTCCACTTCTCTGCGAAGACAAGAAGCTTCCATACGTCTTTGTTTCGCA  
GCAAGGCTGCCCTCGGACGCGCTTGTGGAGTCACTCGTCCAGTGATCGTCTCAATCACTCA  
AAACGAAGGATCTCAGCTCAAATCTCAAATTCAGAAGATCAAGGAGGACGTTGAGAAGCTTCTC  
ATCTAAATCCTTCTTTTATCAATTTGTTGTTACGTTACCTCATTTGTTGTTATATGATAATCCAT  
TCATTGTTTTGTTGTCCCAAATTGCAAATACATAATCAGATCTGCCGGTCTCCCTATAGTGAGT  
CGTATTAATTTTCGATAAGCCAGGTTGCTTCTCGCTCACTGACTCGCTGCGCTCGGTCTCGG  
CTGCGGCGAGCGGTATCAGCTCACTCAAAGNGGTAATANGNTNATCCACAGAATC

prp-8 RNAi clone (C50C3.6)

TAGGGCGATTGGGTACCGGGCCCCCCTCGAGGTCGACGGTATCGATAAGCTTGATTAACGACC  
AAGCCAATTAACGGAGCCATCTTCATCTTCAATCCACGTACTGGTCAGCTTTTCCTCAAGATCA  
TTCATACATCCGTATGGGCTGGACAGAAGCGTTTGTGCGCAGTTGGCCAAGTGGAAAACAGCAGA  
AGAAGTTGCTGCCCTCATTCGTTTCGCTTCCAGTTGAAGAACAACCACGCCAGATCATTGTAACA  
AGAAAAGCTATGCTCGATCCATTGGAGGTGCATCTTCTCGATTTCCCGAATATTTGTCATCAAGG  
GATCTGAGCTCATGTTACCATTCCAAGCTATCATGAAGGTTGAAAAATTCGGTGATTTAATTCT  
CAAGGCCACCGAGCCACAGATGGTGTGTTCAATCTGTACGATGATTGGCTCAAGACAATTTCT  
TCATACACTGCTTTCTCTCGTGTGCTTCTTATCATGCGTGGAATGCACATTAATCCAGATAAGA  
CTAAAGTTATCTTGAAACCAGACAAGACTACTATCACCGAGCCTCATCATATTTGGCCCACT  
TTCTGACGACGATTGGATCAAGGTTGAATTGGCTCTGAAGGATATGATTCTGGCAGATTATGGA  
AAGAAGAACAATGTGAATGTTGCTTCATTGACTCAATCTGAAGTCAGAGATATTTATTCTTGAA  
TGAAATCTCTGCGCCAAGCCAACAACGTCAACAGATTGCGGATATTGAGAAACAAACGAAAGA  
GCAGAGTCAAGTTACTGCAACGACTACACGAACTGTCAATAAACATGGAGATGAAATTATCACA  
GCAACTACATCGAATTACGAAACAGCATCGTTTGTAGTTCGTACAGAATGGAGAGTTCGTGCTA  
TTTCATCCACAAATCTTCATCTTCGAACTCAACACATCTATGTCAATTCGGATGANGTCAAGGA  
TACAGGATATACTTATATTTCTTCCAAAGAATATCCTCANAAGTNATCACTATCTCGGATCNTCG  
AACACNGATTGCTGGATTCATGTATGGNGTATCGCCACCTGATNATCCNCAAGTAAAGGA

prp-38 RNAi clone (D1054.14)

TAGGGCGATTGGGTACCGGGCCCCCCTCGAGGTCGACGGTATCGATAAGCTTGATATCACAAG  
TTTGTACAAAAAAGCAGGCTTGGCAAACCGCACAGAGAAAGCGGCGAAAACCGTCAAAGGTACA  
AATCCCCAGTTTCTCGTCGAAAAAATCATCCGGCAGCGTATTTATGACAGCATGTACTGGAAAG  
AGCACTGTTTTGCGCTCACAGCTGAACTGGTTCGTGGACAAGGGAATGGATCTTCGATACATCGG  
AGGTATCTACGCAGGAAACATCAAACCAACTCCTTTTTTGTGCCTCGCTCTCAAGATGCTACAA  
ATTCAGCCGGACAAGGATATCGTTCTTGAATTCATTCAACAAGAGGAATTCAGATATATCAGAG  
CTCTAGGAGCAATGTATCTTCGACTTACATTTGATTCAACCGAAATTTACGAGTATCTCGAACC  
ATTATATAATGATTTTCGTAAATTAAGATATATGAATAAGATGGGTTCGATTCGAAGCTATCTAC  
ATGGACGATTTTCATCGACAATTTACTTTCGTGAAGATCGCTATTGTGACATTCAACTTCCTCGTC  
TACAGAAGAGATGGGCTCTTGAAGAAGTAGACATGCTTCCGTCATATAAGTCACTTCTTGATGG  
TGATCTTGTGCAATGAGTGATTCTGATTCTGAAGAGGAAGAAGTCACAAAGAAGGAGAAGCCA  
CGTTTGACATCTAGAAGACGTAGTTCGAAGCAGAGATCGCGAAAGAGATGTTGGTGATCGACGAG  
AAGTTTCGTGAACGAGAAAACTGAAAGAACGAAGAGAAAGAGGAGACGATGAGCCAGGGCCAAG  
CAGTANTGGNAGTGGTAGACGTGATGATAGAGATGACAGAAGAAGANATCGTGATAGAAGCCGG  
GATAGAGATCGTCGAGATAGANANATGATGATCGTCNTGANANAAAAAA

unc-75 RNAi clone (C17D12.2)

TAGGGCGATTGGGTACCGGGCCCCCCTCGAGGTCGACGGTATCGATAAGCTTGATATCACAAG  
TTTGTACAAAAAAGCAGGCTTGAACCGAGCCATGCAGGTGAAACCAGCAGACACAGACAGCCGT  
CCGGCGAGTCCAAAAGACAAAATGGACGACAAGAAGCTTTTCATCGGAATGCTCTCAAAAACAAC  
AGTCTGAAGATGAAGTTCGTGCTCTTTTCGCCACGTTTGGAGAGCTTGATGAGGTAACCTGTGCT  
CCGTGGAGCCGATGGAGCATCAAAGGGTGTGCATTTGTGAAATACAAGCACGGCCTGGACGCT  
CACATGGCAATATCAGCTCTTCATGGCTCACAACTATGCCCGGAGCCAGCTCAAGTCTTGTGG  
TCAAATACGCGGACACTGAGAAGGAGCGTCAAATCGGCGAATGCAACAGATGGCTGCACAAAT  
GGGAATGTTAAATCCGATGCTTGTGAATCAAGTTGGCATGCAATATAATGCATATCAGCAGGTT  
CTACAGCAACAATCACTTGTGTCACAGACCAATGCGATGGCTAGTGCGGCTTACTTGCCACTTT

TACAGCAGCAGACTACGGATCCCCTCCACGTTCTGCAACTTCAGGCTGCCGCCGCAGCAGCCCA  
GGCAGCAGCAAACCCAGTTTTATCCCAACAAACTCAACAGCAACAACAACAGCAACAACA  
GCCGCACAGCTTCAACTTCAATCCGCAGCAGCTCAGAATCCACATTACGCCCTAGCAGCTCAAG  
CTCTGGCTCAACAACAGGCTGCTCAGCANGCTCANGCAGTGGTGGCTCACTCTCATGCACAAGT  
ACATCAGCACCAGACTGCTCNNTGACATCGACGGCTTCACATGCTCAGACTGAGAATCCTGCCG  
CGAGTAGCTATGGAAGCTTGGCGGCTGCGGCTGCTGCAGCAAATATAGCAGTTTGTTAAGTGG  
GATGGAAAGCCAGCACAACGCCGCCGCGCNGCCNTGCAACTCNCCCAAATCCAGCAACAAGCNCTG  
CAGCACTNNNNNGNGANACCCAGAGAANTGCTTNNNNCCGATGGCTGCAACCTTTTTCA



## Supplementary Data 2

| Primer sequences used for RT-PCR and qPCR |          |                                |  |
|-------------------------------------------|----------|--------------------------------|--|
| Gene                                      | Position | Sequence 5' - 3'               |  |
| <i>tos-1</i> F                            | Exon 1   | ATGATCTACGGATTCGAGTCGTCACCCATC |  |
| <i>tos-1</i> R                            | Exon 4   | TCAAGCGCTATCCTCCAGTGACTTC      |  |
| <i>ret-1</i> F                            | Exon 4   | CATCCGCTGAAGGATCCATAG          |  |
| <i>ret-1</i> R                            | Exon 6   | GAGCTTCCTCAGCAATCGGAG          |  |
| <i>lea-1</i> F                            | Exon 8   | GCTGCTGCAGCAAAGGACAATGCT       |  |
| <i>lea-1</i> R                            | Exon 11  | CTCGACGTGTTTCGGCTGTCTTCTT      |  |
| <i>slo-2</i> F                            | Exon 16  | CTGTGGCTGATATTCCTATCGG         |  |
| <i>slo-2</i> R                            | Exon 20  | TCCGGATTGGACTTCTGATTACG        |  |
| <i>lipI-7</i> F                           | Exon 4   | TGTACATTGGACATCGGTTTC          |  |
| <i>lipI-7</i> R                           | Exon 5   | CGGATATAAATCAAATGCAGC          |  |
| mCherry F                                 |          | GAGCGCGTGATGAACTTCGAG          |  |
| mCherry R                                 |          | TGTAGATGAACTCGCCGTCCTG         |  |
| EGFP F                                    |          | ACCACATGAAGCAGCACGAC           |  |
| EGFP R                                    |          | GTTGCCGTCGTCCTTGAAGAAG         |  |

# Supplementary Figure 1

## Figure 1i

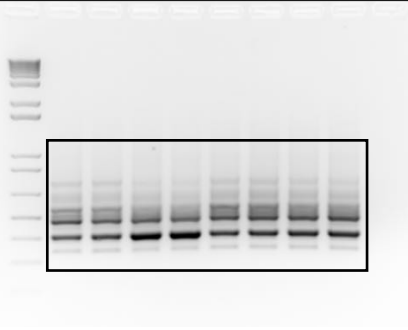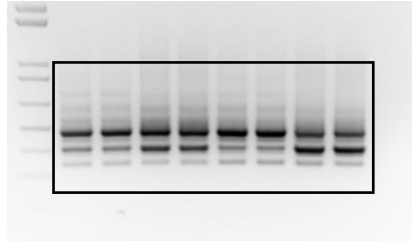

## Extended Data Figure 2b

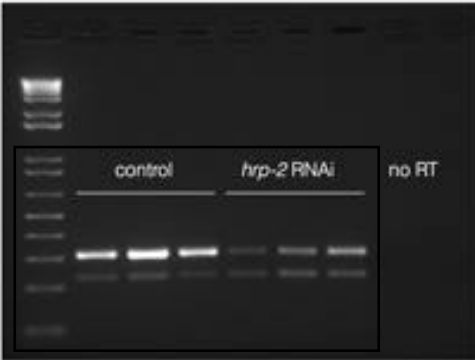

## Extended Data Figure 4e

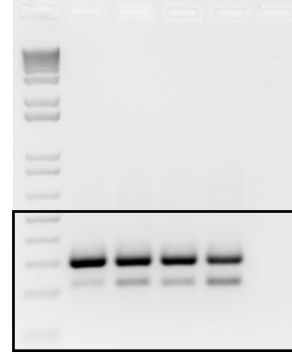

## Extended Data Figure 5a

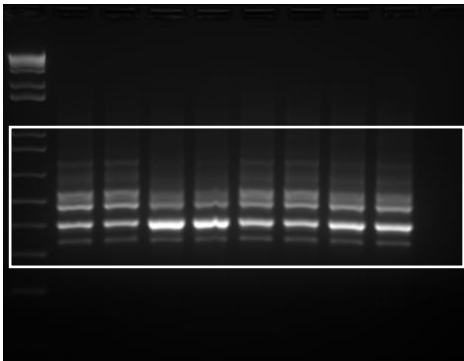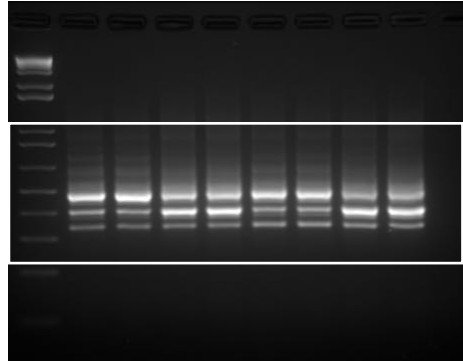

## Extended Data Figure 5b

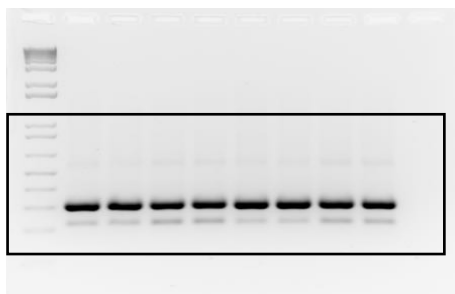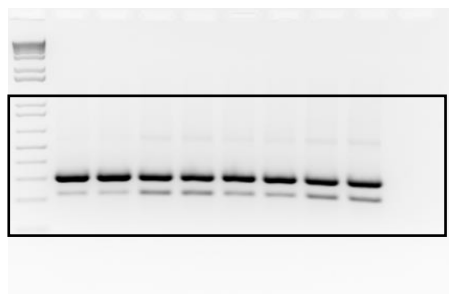

## Supplementary Figure 1 - continued

Extended Data Figure 5f

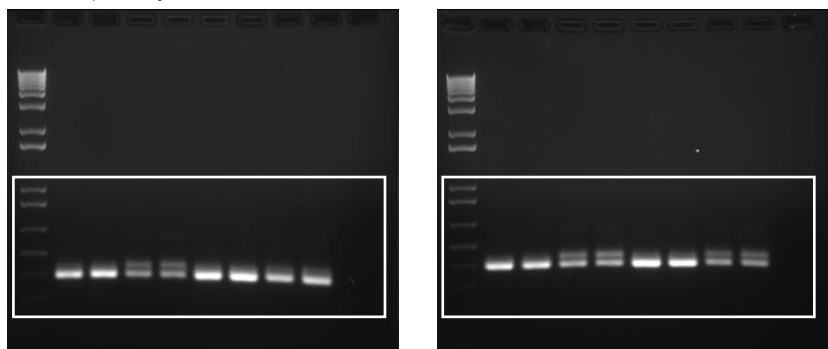

Extended Data Figure 5h

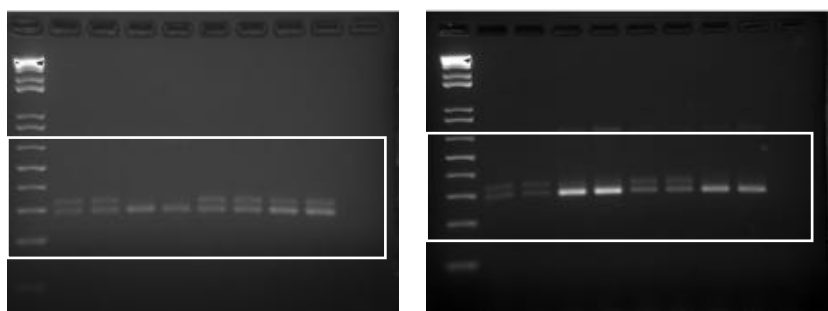

Extended Data Figure 5j

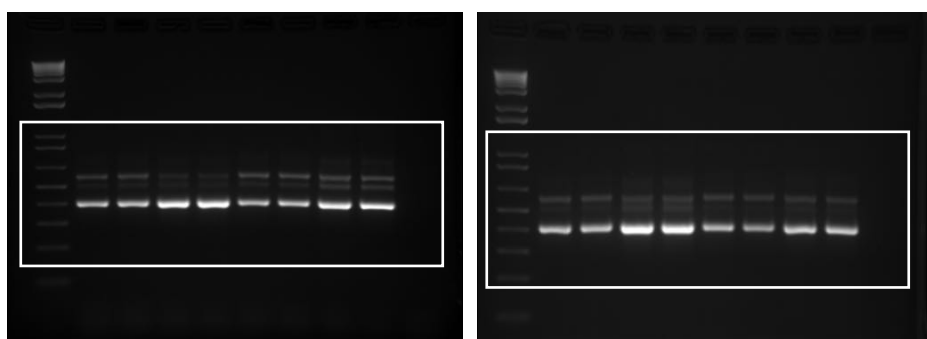

# Supplementary Figure 1 - continued

## Extended Data figure 8e

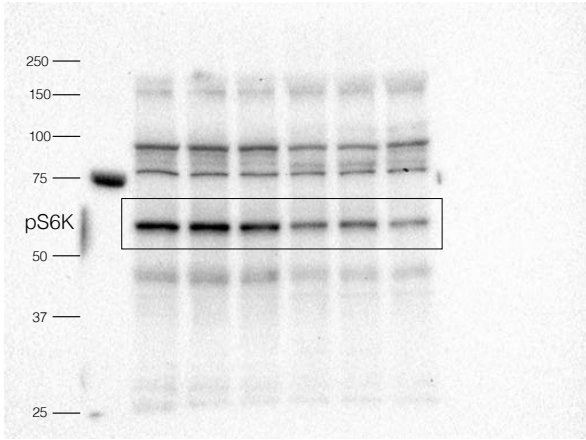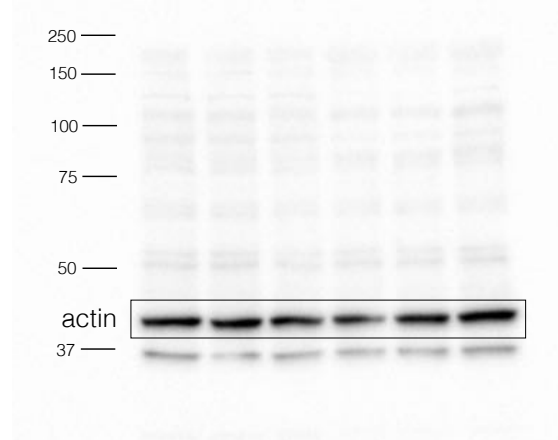

## Extended Data figure 8f

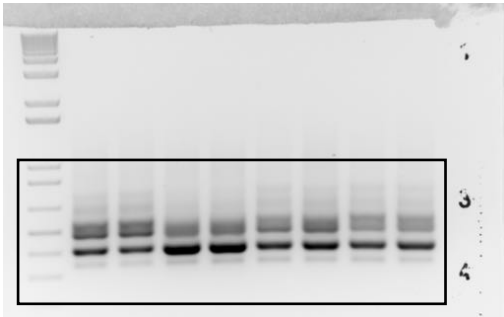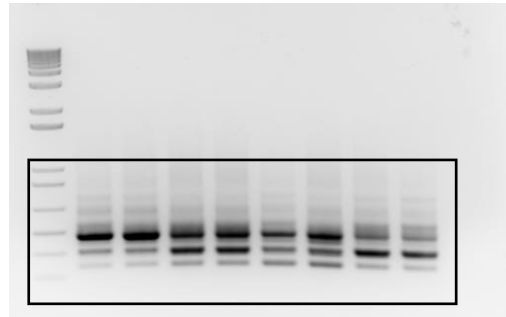

## Extended Data figure 8i

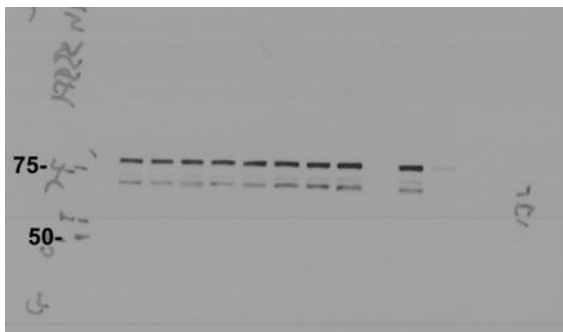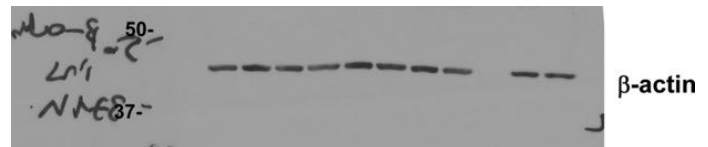

SF1

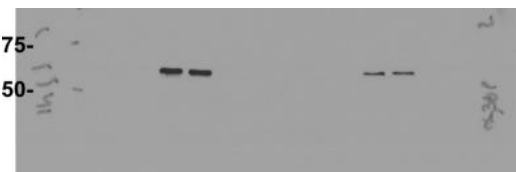

p-S6K (Thr 389)

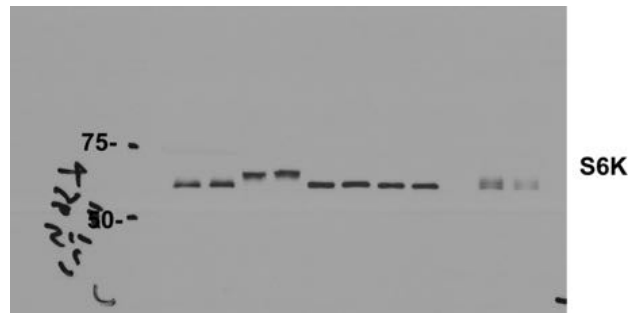

S6K

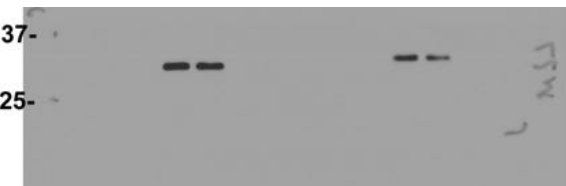

p-S6

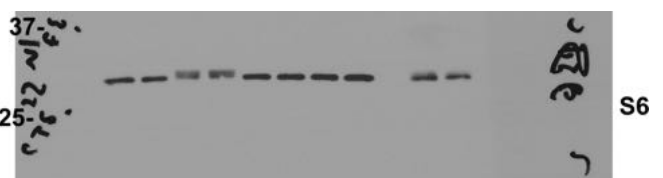

S6

# Supplementary Figure 1 - continued

## Extended Data figure 8j

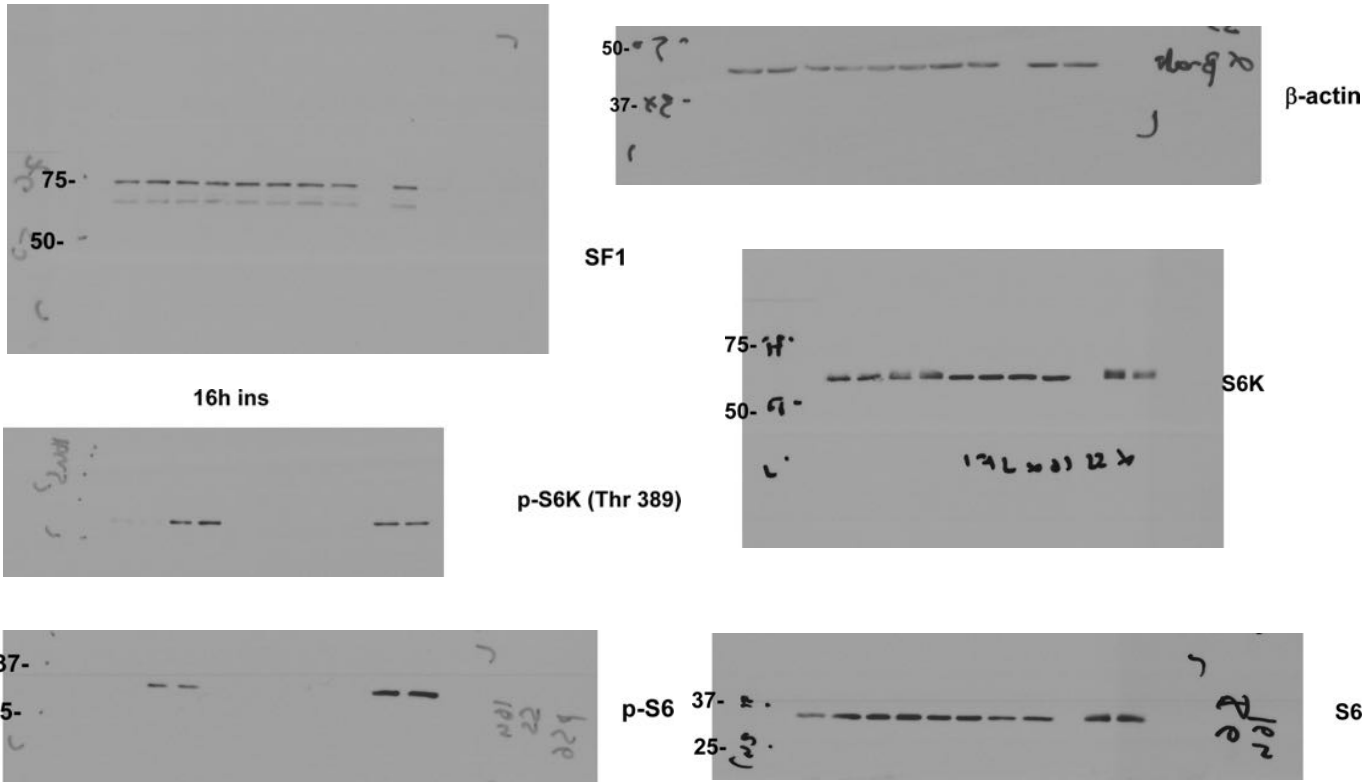

## Extended Data figure 9i

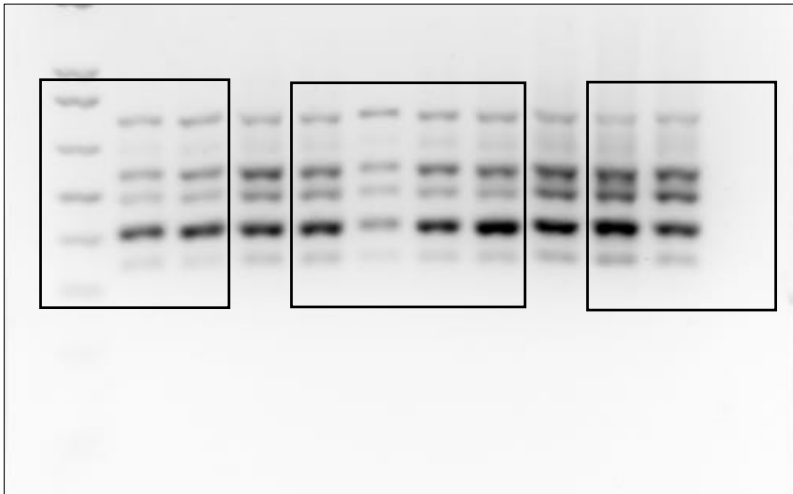

Two samples are not presented in Edf9i because strains were injected with different plasmid concentration.
